# Supplementary material for: Co-doped modified LiLuF4:Eu microcrystalline scintillator-based flexible film for high resolution X-ray imaging
Source: Royal Society of Chemistry journal article supplement (doi:10.1039/d4ce00211c), 2024-01-01
Supplement: d4ce00211c1.pdf [file d4ce00211c1.pdf]

## Supporting information

### Co-doped modified LiLuF<sub>4</sub>:Eu microcrystalline scintillation with flexible film for high resolution X-ray imaging

Xixi Huang<sup>a</sup>, Jinhai Yang<sup>a</sup>, Hao Lu<sup>b,c</sup>, Xieming Xu<sup>b,d</sup>, Shuaihua Wang<sup>b,d,\*</sup> and Shaofan  
Wu<sup>b,d</sup>

*a. College of Chemistry, Fuzhou University, Fuzhou, 350108, PR China.*

*b. Key Laboratory of Optoelectronic Materials Chemistry and Physics, Fujian Institute of  
Research on the Structure of Matter, Chinese Academy of Sciences, Fuzhou, 350002, China*

*c. University of the Chinese Academy of Sciences, Beijing 100049, China*

*d. Fujian Science & Technology Innovation Laboratory for Optoelectronic Information of China,  
Fuzhou, Fujian 350108, China*

**Table S1.** Comparison of the detection limit of reported scintillators

| Scintillators                                                            | The detection limit<br>[nGy s <sup>-1</sup> ] | References |
|--------------------------------------------------------------------------|-----------------------------------------------|------------|
| LiYbF <sub>4</sub> :Tb NCs                                               | 360                                           | [1]        |
| [TPPen] <sub>2</sub> Mn <sub>0.9</sub> Zn <sub>0.1</sub> Br <sub>4</sub> | 204.1                                         | [2]        |
| [FEtQ] <sub>2</sub> MnBr <sub>4</sub>                                    | 258                                           | [3]        |
| K <sub>2</sub> CuBr <sub>3</sub>                                         | 132.82                                        | [4]        |
| Cs <sub>2</sub> AgBiCl <sub>6</sub>                                      | 241                                           | [5]        |
| LiLuF <sub>4</sub> :Eu,Gd                                                | 140.72                                        | This work  |

References: [1] CrystEngComm, 2022, 24, 2551–2557. [2] Adv. Optical Mater. 2023, 2300330. [3]  
Adv. Funct. Mater. 2021, 31, 2102848. [4] ACS Appl. Electron. Mater. 2020, 2, 2242–2249. [5]  
ACS Appl. Electron. Mater. 2022, 4, 4530–4539.

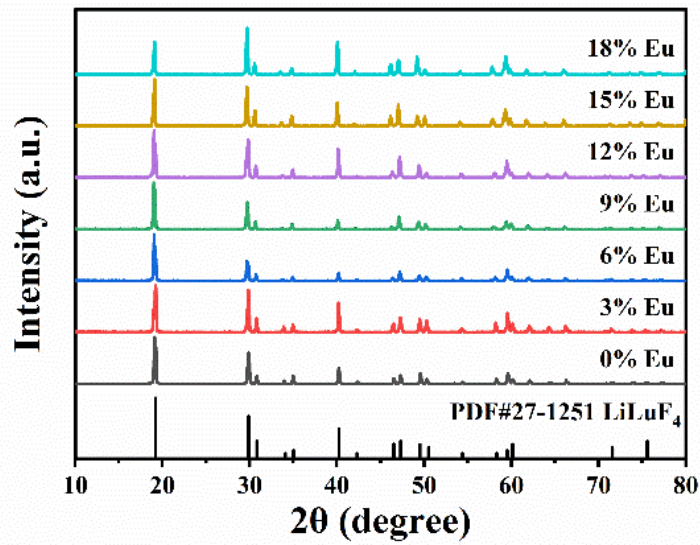

Fig. S1 XRD patterns of  $\text{LiLuF}_4$ : $x\%$ Eu MCs with different  $\text{Eu}^{3+}$  contents.

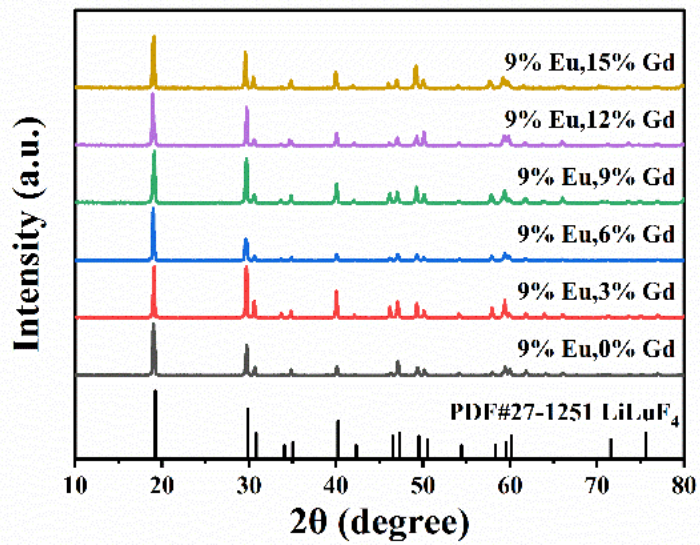

Fig. S2 XRD patterns of  $\text{LiLuF}_4$ :9%Eu, $x\%$ Gd MCs with different  $\text{Gd}^{3+}$  contents.

**a**

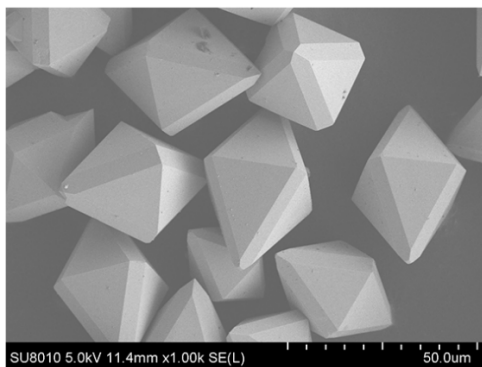

**b**

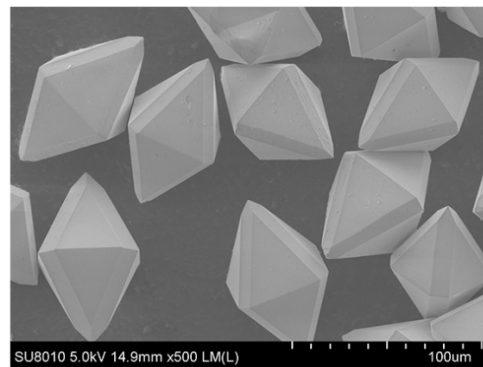

Fig. S3 Partial SEM image of  $\text{LiLuF}_4:9\%\text{Eu}$  MCs (a) and  $\text{LiLuF}_4:9\%\text{Eu},12\%\text{Gd}$  MCs (b).

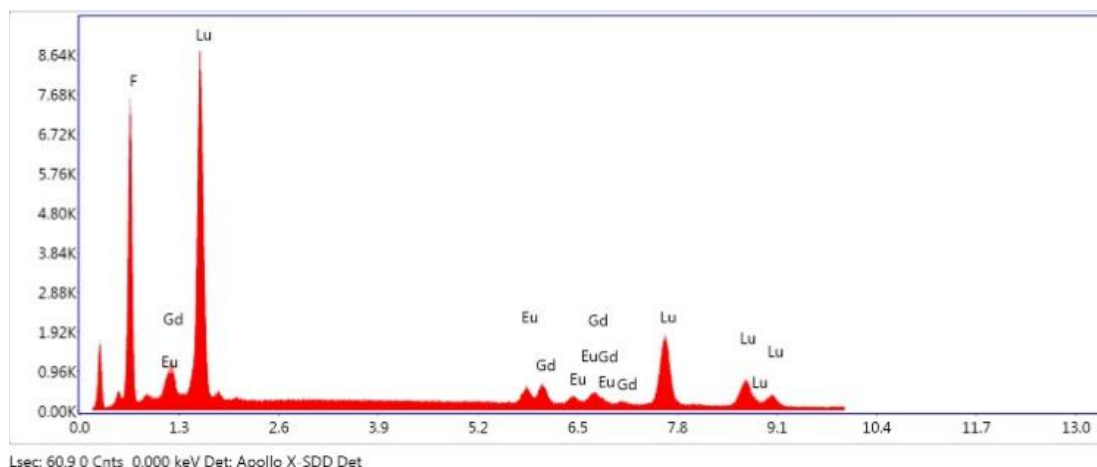

Fig. S4 The EDS of the  $\text{LiLuF}_4:9\%\text{Eu},12\%\text{Gd}$  MCs.

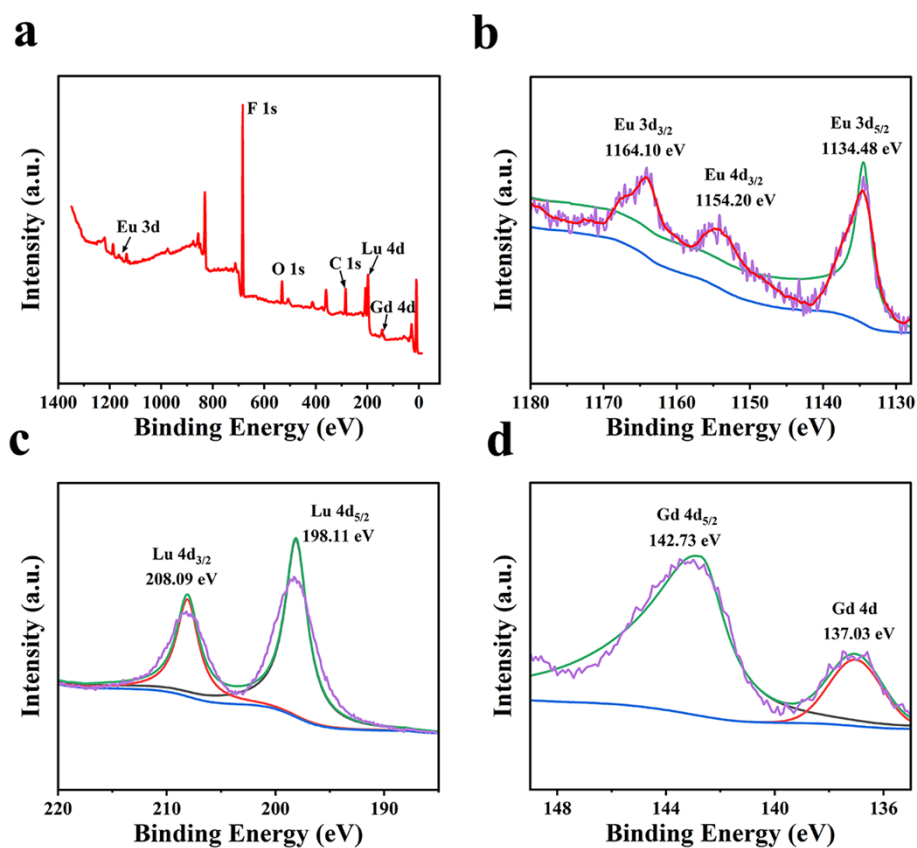

Fig. S5 Full XPS spectra of (a)  $\text{LiLuF}_4:9\%\text{Eu},12\%\text{Gd}$  MCs and high-resolution XPS spectra of (b) Eu 3d, (c) Lu 4d, (d) Gd 4d.

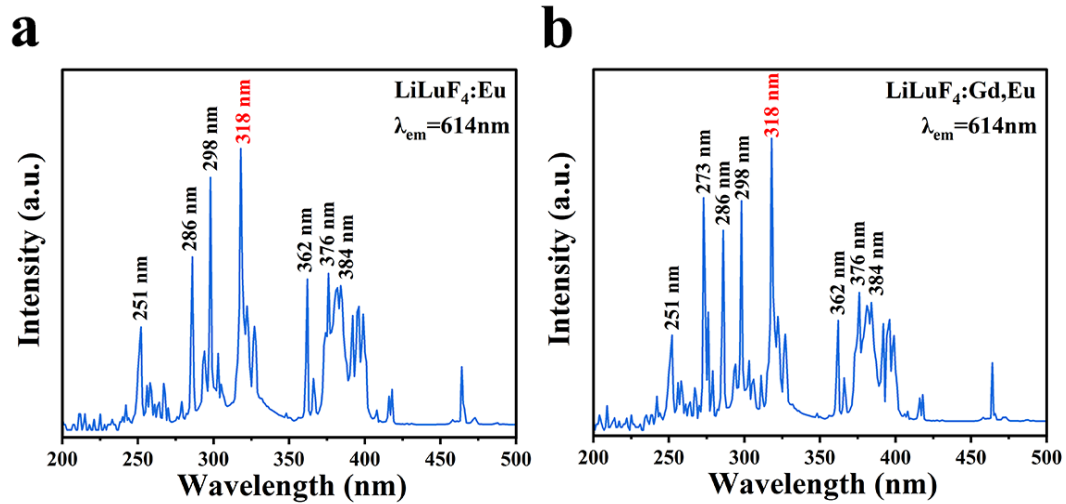

Fig. S6 The excitation spectrum of LiLuF<sub>4</sub>:9%Eu and LiLuF<sub>4</sub>:9%Eu,12%Gd MCs.

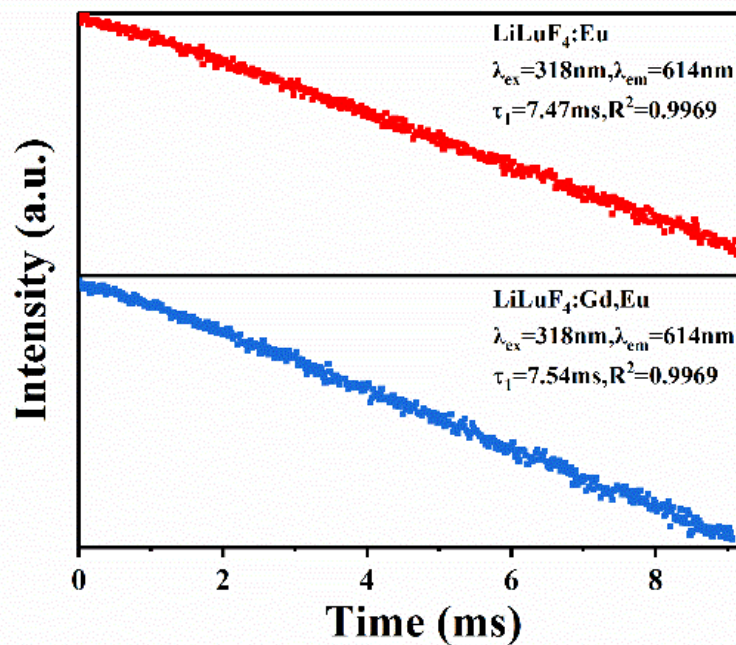

Fig. S7 Photoluminescence decay spectra of LiLuF<sub>4</sub>:9%Eu (top) and LiLuF<sub>4</sub>:9%Eu,12%Gd (bottom).

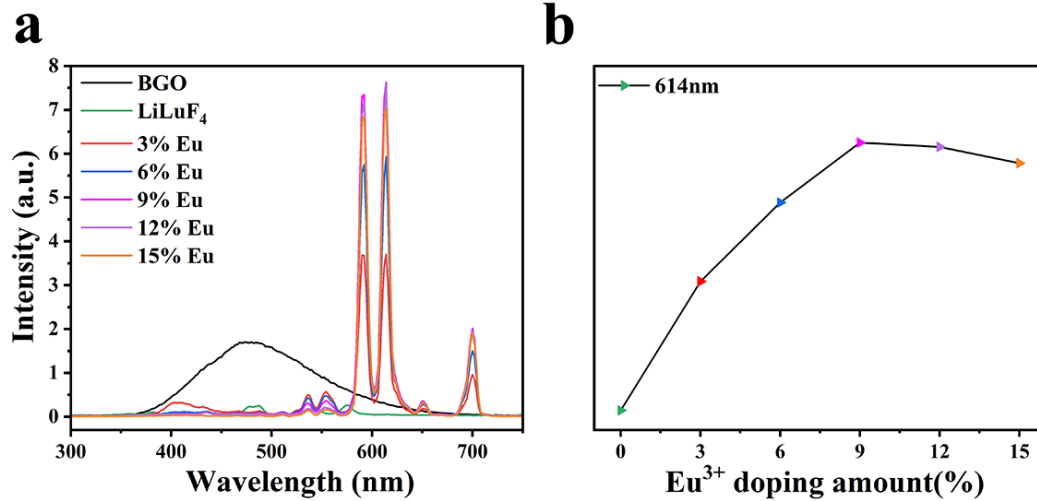

Fig. S8 X-ray luminescence spectra of LiLuF<sub>4</sub>:x%Eu and BGO at X-ray dose rate 42.29 mGy/s.

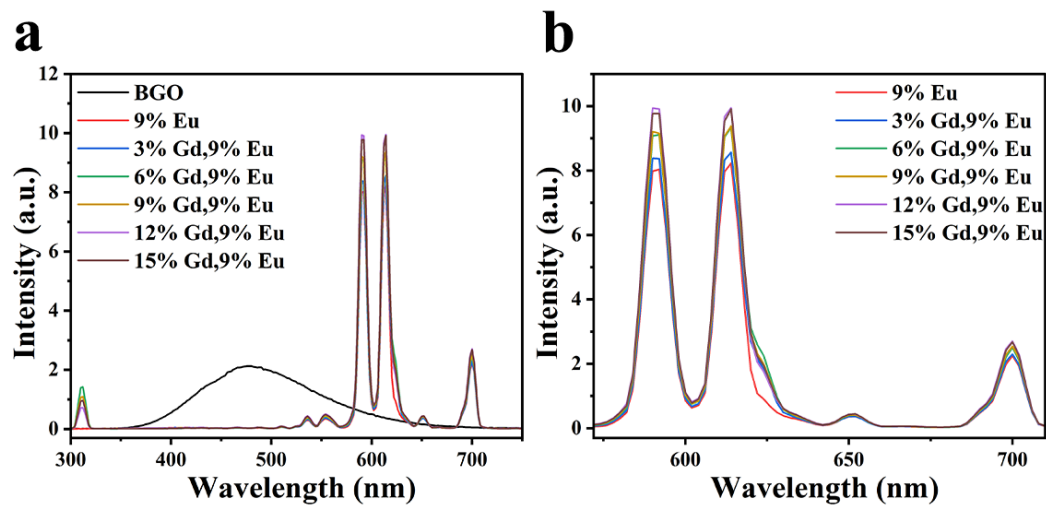

Fig. S9 X-ray luminescence spectra of LiLuF<sub>4</sub>:x%Gd,9%Eu and BGO at X-ray dose rate 42.29 mGy/s.

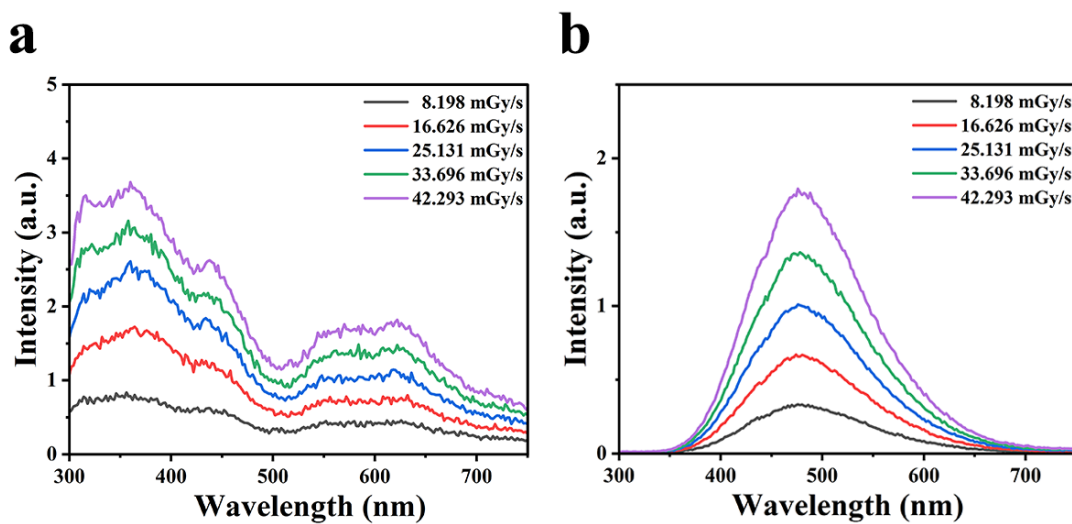

Fig. S10 The radioluminescence spectra of BaF<sub>2</sub> (a) and BGO (b) at a voltage of 50kV and a dose rate of 8.198mGy/s~42.293 mGy/s.

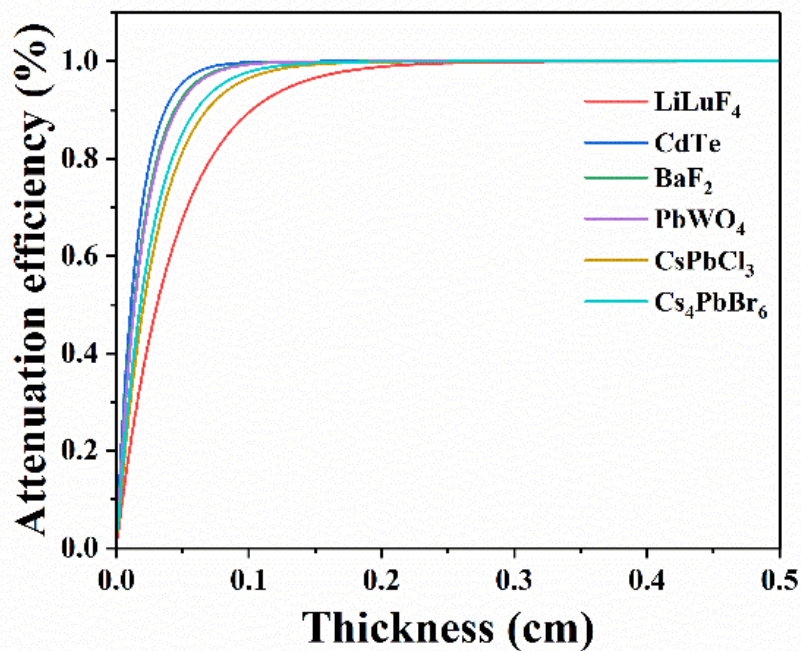

Fig. S11 Attenuation efficiencies as a function of the material thickness of LiLuF<sub>4</sub> and several scintillators to 50 keV X-ray photons.

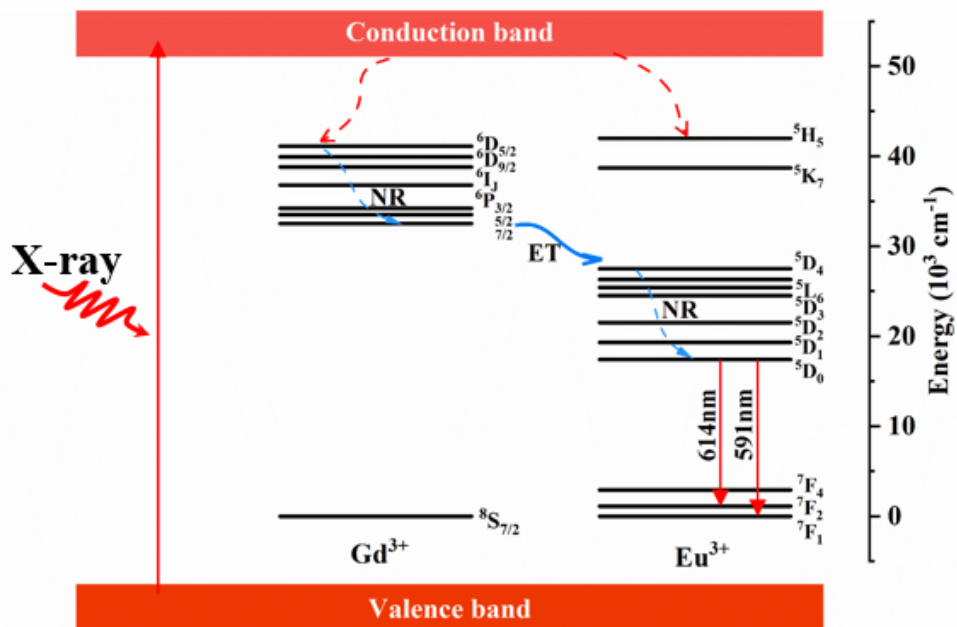

Fig. S12 The energy level transition process of Eu<sup>3+</sup> and Gd<sup>3+</sup>.



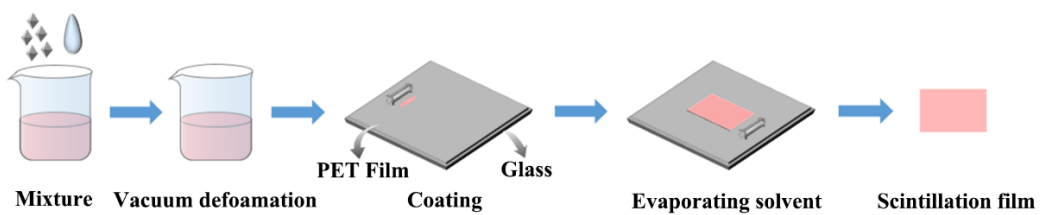

Fig. S13 Schematic diagram of preparation process of  $\text{LiLuF}_4:9\% \text{Eu}, 12\% \text{Gd}$  MCs-EP composite scintillating film.

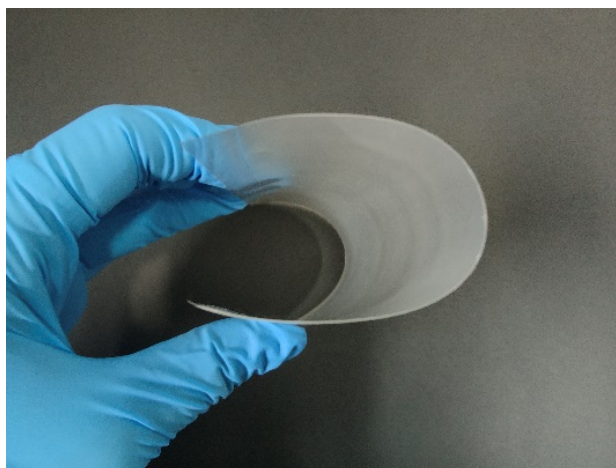

Fig. S14 The physical image of 50wt%  $\text{LiLuF}_4:9\% \text{Eu}, 12\% \text{Gd}$  scintillation film.

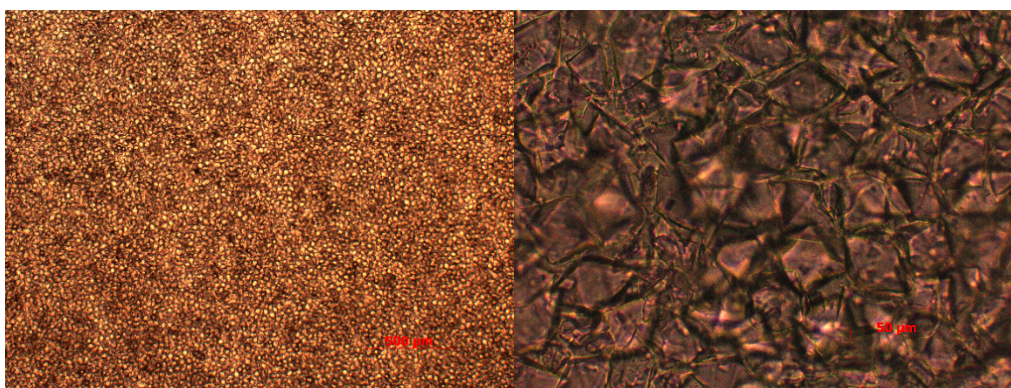

Fig. S15 The grain distribution of  $\text{LiLuF}_4:9\% \text{Eu}, 12\% \text{Gd}$  film observed under a microscope.

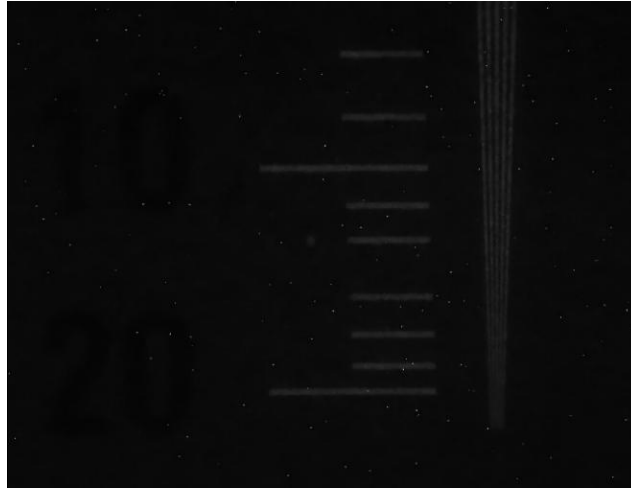

Fig. S16 The grayscale image at 10-20 LP/mm of  $\text{LiLuF}_4:9\%\text{Eu},12\%\text{Gd}$  scintillation film.

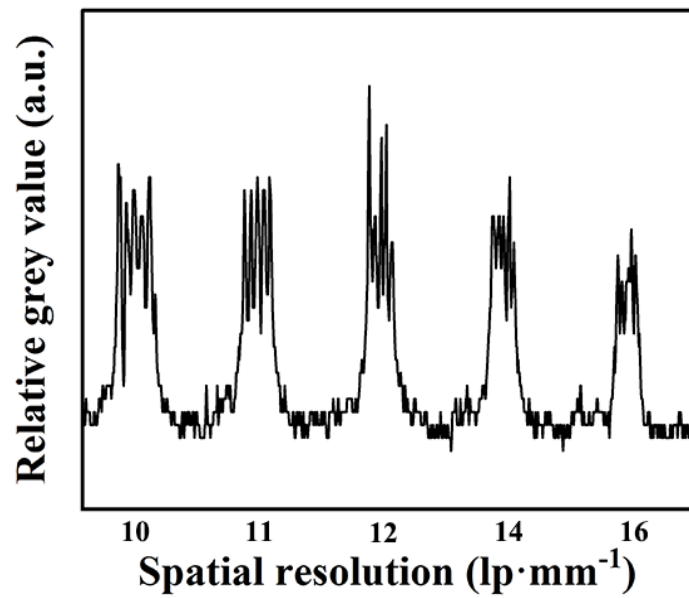

Fig. S17 The stripe brightness extraction map of  $\text{LiLuF}_4:9\%\text{Eu},12\%\text{Gd}$  film at 10-16 LP/mm.



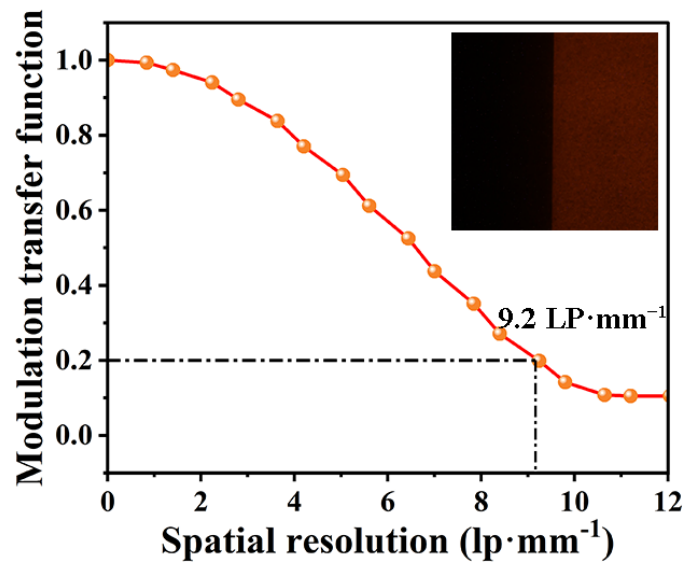

Fig. S18 Modulation transfer functions (MTF) of the X-ray edge image obtained by LiLuF<sub>4</sub>:9%Eu film.
